# Supplementary material for: MicroRNA-26a supports mammalian axon regeneration in vivo by suppressing GSK3β expression
Source: PubMed Central journal article supplement (PMC4558520; doi:10.1038/cddis.2015.239), 2015-08-27
Supplement: cddis2015239x1.pdf [file cddis2015239x1.pdf]

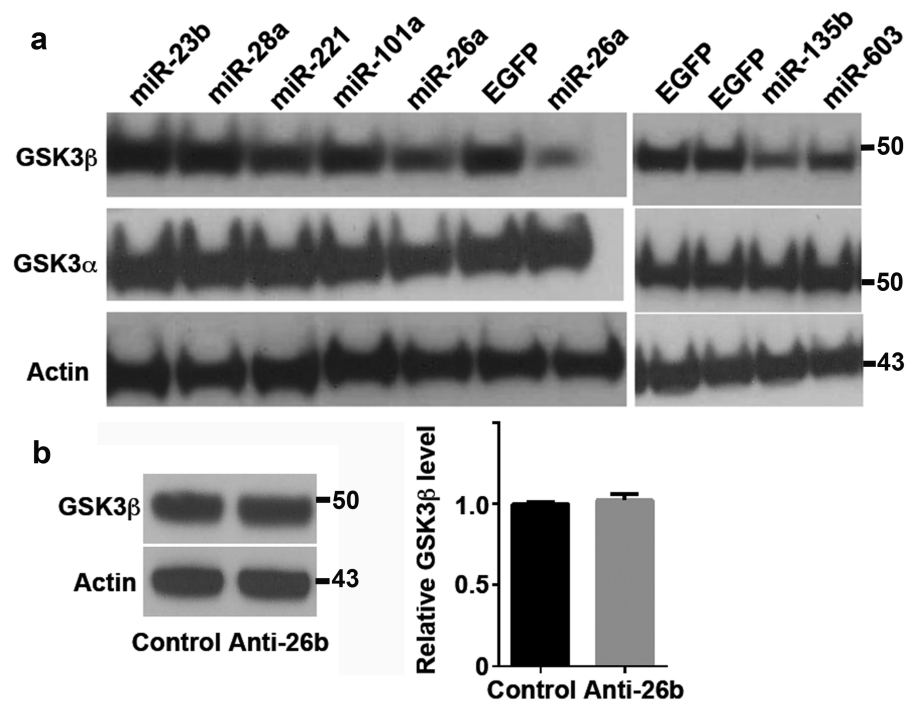

**Supplementary Figure S1. miR-26a targets GSK3 $\beta$  but not GSK3 $\alpha$ .** (a) In a neuronal cell line miR-26a most efficiently regulated GSK3 $\beta$  expression. (b) In adult mouse sensory neurons, miR-26b had no regulatory effect on GSK3 $\beta$  expression.

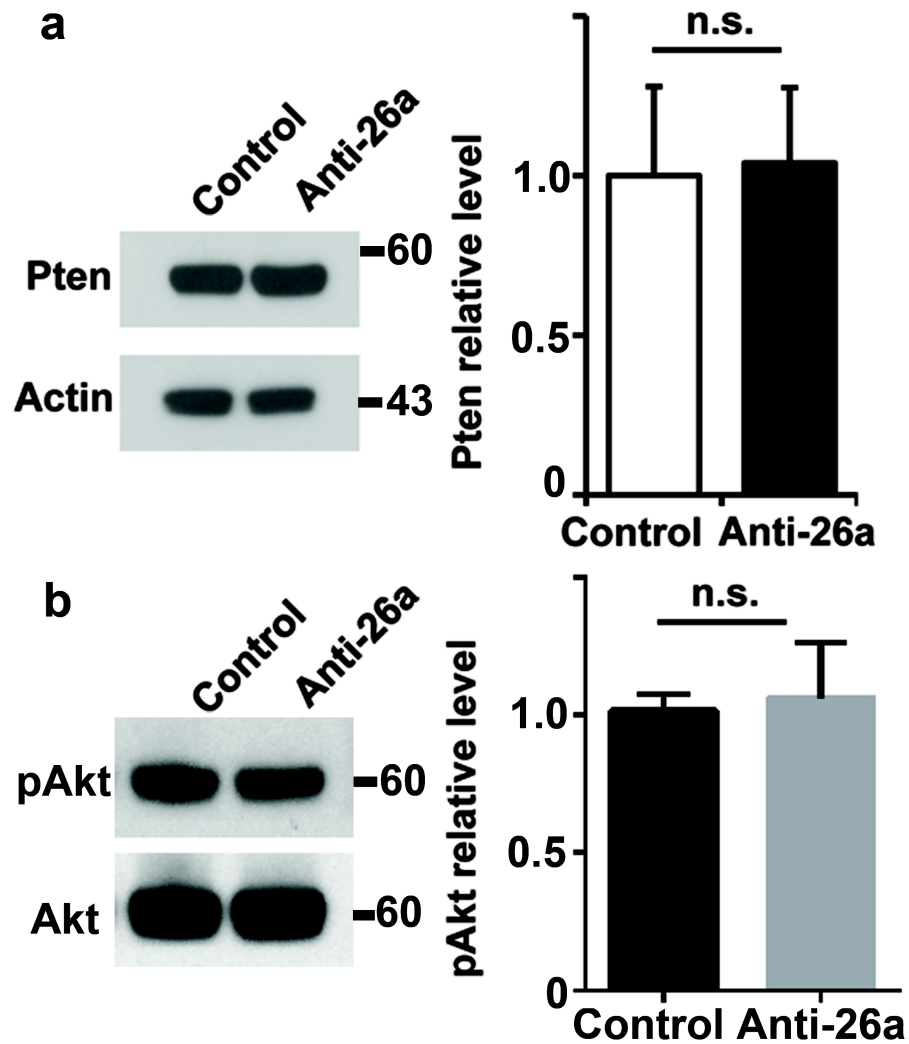

**Supplementary Figure S2. Endogenous miR-26a does not target Pten pathway in adult mouse sensory neurons.** (a) Representative western blot image and quantification of Pten (normalized to actin, n = 3) in cultured adult mouse sensory neurons 3 days after inhibition of miR-26a (anti-26a). (b) Representative western blot image and quantification of phosphorylated Akt (normalized to Akt, n = 3) in cultured adult mouse sensory neurons 3 days after inhibition of miR-26a.

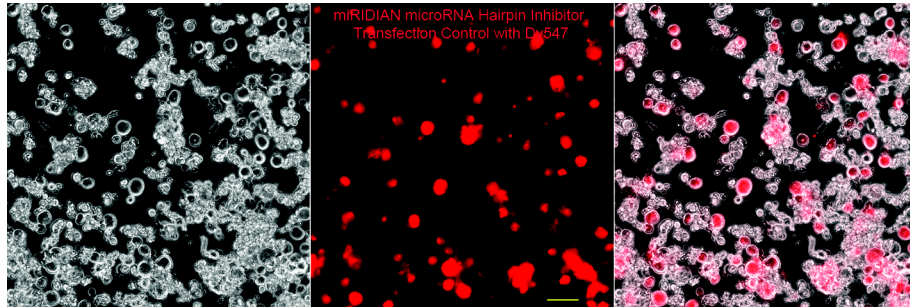

**Supplementary Figure S3. Electroporation of fluorescence dye labeled microRNA inhibitor in adult mouse sensory neurons.** Note the high transfection efficiency. Scale bar = 100  $\mu\text{m}$ .
